# Supplementary material for: A symmetric toggle switch explains the onset of random X inactivation in different mammals
Source: Springer Nature journal article supplement (doi:10.1038/s41594-019-0214-1), 2019-04-08
Supplement: MOESM3 [file 41594_2019_214_MOESM3_ESM.xlsx]

## Sheet: qPCR primers
qPCR	forward	reverse
Tsix 3'	AGCACACCAAAAGCATCACCAGT	TCCATCGTGGAGCCAGGTGCT
Tsix 5'	GTGTGTCATAGCTCAAGAGG	GGAGCCTAAACCTGTCTGTC
Tsix spliced	CCGAGATATCCACGCATCTT	CGGGTTCTTGGTCGATGTAA
Xist	GGTTCTCTCTCCAGAAGCTAGGAA	TGGTAGATGGCATTGTGTATTATATGG
Rrm2	CCGAGCTGGAAAGTAAAGCG	ATGGGAAAGACAACGAAGCG
Rplp0	TCCAGAGGCACCATTGAAATT	TCGCTGGCTCCCACCTT

## Sheet: Pyrosequencing
Position	SNP position (mm9)	Forward	Reverse	Sequencing	Dispensation order
Tsix 5'	100648884	CCTCCCCATCTTTAGCTCTCATGT	TGGCCTGAGACTGAGCAACAAT-biotin	ATGTTCCATGGGCCT	T/CGGGCAGTGTGT
Tsix 3'	100679024	TAAGATGCCAATGACCCAAAACTA	TGAGGAGAGGAAAGGGTAGAAAT-biotin	AAGCCCACCAAATCG	C/GTCACAACTA

## Sheet: Antibodies
Antibody	Supplier	Number	Dilution
H3K27me3	Active Motif	39155	1/2500
goat anti-rabbit, labelled with Alexa555	Invitrogen	A-21428	1/2500

## Sheet: TRex amplicons
Gene Name	Transcript IDs	SNP position (mm10)	SNP ID (dbSNP)	Chromosome	Assay ID
Xist	NR_001570, NR_001463	10030062	rs29080493	X	10030062
Xist	NR_001570, NR_001463	10030417	rs31372548	X	10030417
Xist	NR_001570, NR_001463	10038162	rs31823151	X	10038162
Xist	NR_001463	10055737	rs29080913	X	10055737
Rrm2	NM_009104			12	7285426
Rplp0	NM_007475			5	7285083
Fbxo28	NM_175127			1	7237479
Exoc1	NM_027270			5	7235075

## Sheet: Stellaris FISH probes
st02_Tsix_Dxpas34_Heard	st03_Tsix_3_to_Xist_intron1_Heard	st05_Xist_intron1_Heard
Fluorescein	Quasar 570	Quasar 670
cttgcaggtacttttgggac	gtactaccttgttagctact	ctttgacttttcagtgggtg
agtgagaacagagcaagggc	actctggctgtttagactac	gctgagaagagctagtgact
aagatgcgtggatatctcgg	tcaagtaactcatccagtgc	tggcatactatgtgttgtgt
actatcccgcaagaatttca	tcatcacaacagcagttctc	tggcgattgggtacacaatg
actgtcctgaaagcactttg	gctgctgagtgtttgatatg	atcgcttctcattttagtgt
aggcattttaccttcatctc	ccgagtacttaggtcttttt	tcacacaggcagtacatttc
aactatcggttcgggactac	agctttctctagtgtgaagg	aatttcaaccccagtagact
attttagttattcctccgtt	ccaccattaaactctggcaa	cacttccctctttaagaagt
tagtctaaccacctgtaagg	tgacctaagccttctaatca	tggcgtacagctaagcataa
gtatgttagctatctttcca	aatctttgtgtggcctttag	atattcccaattcctacaca
atccatttgagccattagtc	caagtatctttgcttggtct	ttctgggcagaaatgcagta
gcattttagtaaagtctccc	tgtactgagggtgatgagtc	ttatccttctttgcactttt
cgtggcagacattttagtga	tgcaaggtggattgactgtg	tctgttgaaaagtgctggca
cgtggcagacattttagtga	caggaccaactgccagaaaa	gctagaccattttctacaca
cgtggcagacattttagtga	cccgattttgtatattgcta	agtactagagggtcatttgc
ttttagtgatagcccagatc	gccaactgtctgcttaagaa	aacctgctgcgaaggaattt
acattttagtgatagcccag	ggaagcttagcacttttctt	aatgctaagcctttggagtt
acattttagtgatagcccag	atattgcaggcaagtagctc	tattatcacctagagagcca
ggcaggcattttagtgatag	attcttgcctacctttatta	caatggtcctagtttcctaa
taaggcagggattttagcga	ttattccaattccaactgct	ccttgcaaatgtttcctttt
cattttagtcgacctctagg	gccttcaatctttaacttgc	agctaactgtcttagtgcac
ctatcccagacattttcatc	caggccaaaactaggtggat	aatggtgctaaggtgagacc
attttagccaaccatctcta	tgggtaatgttaattacccc	cataggaggcaggctgaaag
gcttattgaacgctttgcat	atatggctacagtgtctcag	agtctgagtcctaatctcta
tagactgcagtttattaccc	acaacaccagtttactcact	gtgaatagcagcagtaccag
acgcccttaactttcttttc	cccttctcttgacttaaagt	aactgtcagtgatagtgggt
attctagaccctgctacaag	cttttgcctctttgtttgaa	ctgctcacacaacttgatca
agagtttttcggacacgagg	ctttctcaattccatcatgc	attggccctgattaatgatc
ggtgaggtagtattgctgaa	ctcacactttatagtgttcc	aggtcatgtaggactaggtt
cccattggtttttagcataa	caacaatgacccggatttcg	agtgtgtattttacagtgcc
gaaaaccccactaaagcgga	tgctagtttcccaatgatat	acaagctcatgttccagatg
gctaccagtaatttttccac	actccaacttgagcaaatcc	ttatggggaccaaagatggc
gcagacttagttactcgttc	gcagttctggatggtttatt	gggaactctttgtattccat
cttccaaggcttctcaaaga	tgggactcttaataggcaca	tgattactgacagtgagggc
caacgataccagagatcggg	tgctctcttccttaaactga	gaagatggtgatggcgagtt
gggttttcaaagcactcaga	tactgtcaatgagcacaggg	atgtatacagttcaggcagc
gtcccagatagtagaaactt	acattattgcagaggttgct	ggacagcttggaagaaagct
tgagaattgttttgccttgc	tgtctggaatattttgtccc	acaaactcctaagtctgggt
ttccgtgcctatagtaaata	cataccatcaaggctactga	attcacttgttctacagggt
ataaacactaccgggaggga	aaggttctgaaatgcctacc	ccaccacttaatgaaggtgt
ttgtttgctcgtctgaacac	ccttacacatatgacctgtg	gcaaaatccactacttccac
actggattcattccttagtg	tgagcacttctcttgtcaat	gccacagggctttgtaaaat
attgttaatttccctccttt	ttttgacaccagaggcatat	atacaaagacctggtctggt
ccaaatccgcatcaaaacca	ggagttggattttacatcct	gctaggttatatggcagtat
tctttcttctcttccgaatt	aatgcagttagttgtccatc	cagaagaggttcactggact
tttgtctgcctactaacaca	cgaagtgctcttcatttgga	ccagaggactaagtaagggg
ttaccttctaggggaatctt	aagaactactgtaccctctt	cacaaatagagccatcttcc
ccctgccatttcaatgaaac	tcacatgtctaagcacttct	aaggcctttcatttcttttc
